# Supplementary material
Source: MDPI journal article supplement (https://www.mdpi.com/1424-2818/13/10/468)
Supplement: s1 [file s1]

**Table S1.** Organization of the three Satyrinae species (*Hipparchia autonoe* (Hip)), *Paroeneis palaeartica* (Par), and *Oeneis buddha* (Oen)) mitochondrial genomes.

| Gene                     | Direction | Location    |             |             | Size |      |      | Intergenic nucleotides |     |     | Start/stop codon |          |          |
|--------------------------|-----------|-------------|-------------|-------------|------|------|------|------------------------|-----|-----|------------------|----------|----------|
|                          |           | Hip         | Par         | Oen         | Hip  | Par  | Oen  | Hip                    | Par | Oen | Hip              | Par      | Oen      |
| <b>tRN<sup>Met</sup></b> | J         | 1~67        | 1~68        | 1~69        | 67   | 68   | 69   | 0                      | 0   | 0   |                  |          |          |
| tRNA <sup>Ile</sup>      | J         | 68~132      | 69~133      | 70~134      | 65   | 65   | 65   | -3                     | -3  | -3  |                  |          |          |
| tRNA <sup>Gln</sup>      | N         | 130~198     | 131~199     | 132~200     | 69   | 69   | 69   | 49                     | 48  | 51  |                  |          |          |
| ND2                      | J         | 248~1261    | 248~1261    | 252~1265    | 1014 | 1014 | 1014 | -2                     | -2  | -2  | ATT/TAA          | ATT/TAA  | ATT/TAA  |
| tRNA <sup>Trp</sup>      | J         | 1260~1326   | 1260~1326   | 1264~1330   | 67   | 67   | 67   | -8                     | -8  | -8  |                  |          |          |
| tRNA <sup>Cys</sup>      | N         | 1319~1389   | 1319~1383   | 1323~1386   | 65   | 65   | 64   | 0                      | 0   | 0   |                  |          |          |
| tRNA <sup>Tyr</sup>      | N         | 1384~1447   | 1384~1451   | 1387~1451   | 64   | 68   | 65   | 8                      | 8   | 6   |                  |          |          |
| COX1                     | J         | 1456~2991   | 1460~2995   | 1458~2993   | 1536 | 1536 | 1536 | -5                     | -5  | -5  | CGA/TAA          | CGA /TAA | CGA /TAA |
| tRNA <sup>Leu</sup>      | J         | 2987~3053   | 2991~3057   | 2989~3055   | 67   | 67   | 67   | 0                      | 0   | 0   |                  |          |          |
| COX2                     | J         | 3054~3729   | 3058~3733   | 3056~3731   | 676  | 676  | 676  | 0                      | 0   | 0   | ATG/T            | ATG/T    | ATG/T    |
| tRNA <sup>Lys</sup>      | J         | 3730~3800   | 3734~3804   | 3732~3802   | 71   | 71   | 71   | 1                      | 1   | 1   |                  |          |          |
| tRNA <sup>Asp</sup>      | J         | 3802~3867   | 3806~3871   | 3804~3871   | 66   | 66   | 68   | 0                      | 0   | 0   |                  |          |          |
| ATP8                     | J         | 3868~4032   | 3872~4036   | 3872~4033   | 165  | 165  | 162  | -7                     | -7  | -7  | ATT/TAA          | ATT/TAA  | ATT/TAA  |
| ATP6                     | J         | 4026~4703   | 4030~4707   | 4027~4704   | 678  | 678  | 678  | -1                     | -1  | -1  | ATG/TAA          | ATG/TAA  | ATG/TAA  |
| COX3                     | J         | 4703~5491   | 4707~5495   | 4704~5492   | 789  | 789  | 789  | 2                      | 2   | 2   | ATG/TAA          | ATG/TAA  | ATG/TAA  |
| tRNA <sup>Gly</sup>      | J         | 5494~5559   | 5498~5564   | 5495~5560   | 66   | 67   | 66   | 0                      | 0   | 0   |                  |          |          |
| ND3                      | J         | 5560~5913   | 5565~5919   | 5561~5914   | 354  | 355  | 354  | 0                      | 0   | -1  | ATC/TAA          | ATT/T    | ATT/TAA  |
| tRNA <sup>Ala</sup>      | J         | 5914~5979   | 5920~5983   | 5914~5978   | 66   | 64   | 65   | 0                      | 1   | 1   |                  |          |          |
| tRNA <sup>Arg</sup>      | J         | 5980~6041   | 5985~6046   | 5980~6041   | 62   | 62   | 62   | 0                      | 4   | 2   |                  |          |          |
| tRNA <sup>Asn</sup>      | J         | 6042~6105   | 6051~6116   | 6044~6110   | 64   | 66   | 67   | 0                      | -3  | -3  |                  |          |          |
| tRNA <sup>Ser</sup>      | J         | 6106~6165   | 6114~6173   | 6108~6169   | 60   | 60   | 62   | 2                      | 2   | 5   |                  |          |          |
| tRNA <sup>Glu</sup>      | J         | 6168~6232   | 6176~6243   | 6175~6239   | 65   | 68   | 65   | -2                     | 0   | -2  |                  |          |          |
| tRNA <sup>Phe</sup>      | N         | 6231~6294   | 6244~6308   | 6238~6303   | 64   | 65   | 66   | 0                      | 0   | 3   |                  |          |          |
| ND5                      | N         | 6295~8029   | 6309~8046   | 6307~8041   | 1735 | 1738 | 1735 | 0                      | -3  | 0   | ATC/T            | ATT/T    | ATT/T    |
| tRNA <sup>His</sup>      | N         | 8030~8095   | 8044~8110   | 8042~8107   | 66   | 67   | 66   | 0                      | 0   | 0   |                  |          |          |
| ND4                      | N         | 8096~9434   | 8111~9119   | 8108~9446   | 1339 | 1339 | 1339 | -1                     | -1  | -1  | ATG/T            | ATG/T    | ATG/T    |
| ND4L                     | N         | 9434~9724   | 9449~9739   | 9446~9736   | 291  | 291  | 29   | 2                      | 2   | 2   | ATG/TAA          | ATG/TAA  | ATG/TAA  |
| tRNA <sup>Thr</sup>      | J         | 9727~9790   | 9742~9806   | 9739~9802   | 64   | 64   | 64   | 0                      | 0   | 0   |                  |          |          |
| tRNA <sup>Pro</sup>      | N         | 9791~9855   | 9806~9870   | 9803~9867   | 65   | 65   | 65   | 5                      | 5   | 2   |                  |          |          |
| ND6                      | J         | 9861~10385  | 9876~10400  | 9870~10394  | 525  | 525  | 525  | -1                     | -1  | -1  | ATT/TAA          | ATA/TAA  | ATT/TAA  |
| CYTB                     | J         | 10385~11536 | 10400~11551 | 10394~11545 | 1152 | 1152 | 1152 | 8                      | 8   | 8   | ATG/TAA          | ATG/TAA  | ATG/TAA  |
| tRNA <sup>Ser</sup>      | J         | 11545~11612 | 11560~11625 | 11554~11619 | 68   | 66   | 66   | -2                     | -2  | -2  |                  |          |          |
| ND1                      | N         | 11611~12564 | 11624~12577 | 11618~12571 | 954  | 954  | 954  | 4                      | 4   | 4   | ATA/TAA          | ATA/TAA  | ATA/TAA  |

|                     |   |             |             |             |      |      |      |     |     |     |
|---------------------|---|-------------|-------------|-------------|------|------|------|-----|-----|-----|
| tRNA <sup>Leu</sup> | N | 12569~12635 | 12582~12649 | 12576~12642 | 67   | 68   | 67   | -24 | -25 | -29 |
| 16S rRNA            | N | 12612~13969 | 12625~13986 | 12614~13975 | 1358 | 1362 | 1362 | 1   | 1   | 0   |
| tRNA <sup>Val</sup> | N | 13971~14034 | 13988~14051 | 13976~14039 | 64   | 64   | 64   | 7   | 0   | 0   |
| 12S rRNA            | N | 14042~14539 | 14052~14903 | 14040~14807 | 498  | 852  | 768  | 0   | 0   | 0   |
| A+T rich            |   | 14540~15435 | 14904~15942 | 14808~15259 | 896  | 1039 | 452  |     |     |     |

---

**Table S2.** Summarized mitogenomic characteristics of the 51 Satyrinae species investigated in this study.

| Species                      | Whole genome |        |         | PCGs     |              |        |         | 16S rRNA |        | 12S rRNA |        | A+T-rich |        |
|------------------------------|--------------|--------|---------|----------|--------------|--------|---------|----------|--------|----------|--------|----------|--------|
|                              | Size(bp)     | A+T(%) | AT-skew | Size(bp) | No.of codons | A+T(%) | AT-skew | Size(bp) | A+T(%) | Size(bp) | A+T(%) | Size(bp) | A+T(%) |
| <i>Callerebia suroia</i>     | 15,208       | 77.5   | -0.042  | 11,195   | 3730         | 77.9   | -0.166  | 1347     | 84.4   | 753      | 85.4   | 417      | 94.3   |
| <i>Coenonympha amaryllis</i> | 15,125       | 79.5   | -0.039  | 11,228   | 3741         | 77.9   | -0.166  | 1337     | 84.3   | 759      | 85.0   | 308      | 88.6   |
| <i>Coenonympha arcania</i>   | 15,189       | 80.1   | -0.044  | 11,232   | 3744         | 78.4   | -0.161  | 1359     | 84.7   | 756      | 84.6   | 353      | 91.8   |
| <i>Coenonympha tullia</i> *  | 15,316       | 78.9   | -0.039  | 11,214   | 3736         | 77.8   | -0.167  | 1361     | 85.0   | 759      | 85.5   |          |        |
| <i>Davidina armandi</i>      | 15,214       | 79.7   | -0.023  | 11,188   | 3727         | 78.2   | -0.155  | 1344     | 83.9   | 773      | 85.0   | 368      | 92.9   |
| <i>Elymnias hypermnestra</i> | 15,167       | 80.5   | -0.044  | 11,186   | 3727         | 79.1   | -0.156  | 1311     | 84.7   | 768      | 85.0   | 404      | 90.6   |
| <i>Hipparchia autonoe</i>    | 15,435       | 93.3   | -0.017  | 11,208   | 3735         | 76.8   | -0.156  | 1358     | 83.4   | 498      | 83.7   | 896      | 94.6   |
| <i>Lasiommata deidamia</i>   | 15,244       | 81.1   | -0.034  | 11,191   | 3729         | 79.8   | -0.156  | 1321     | 85.1   | 762      | 85.5   | 417      | 93.0   |
| <i>Lasiommata maera</i>      | 15,192       | 80.2   | -0.027  | 11,190   | 3729         | 78.1   | -0.153  | 1370     | 84.4   | 769      | 87.0   | 537      | 92.0   |
| <i>Lasiommata majuscula</i>  | 15,263       | 81.7   | -0.038  | 11,185   | 3727         | 80.3   | -0.153  | 1384     | 85.1   | 772      | 85.6   | 416      | 93.3   |
| <i>Lasiommata megera</i>     | 15,328       | 81.3   | -0.037  | 11,190   | 3729         | 79.8   | -0.150  | 1391     | 85.2   | 760      | 85.7   | 539      | 87.9   |
| <i>Lethe albolineata</i>     | 15,248       | 79.2   | -0.034  | 11,188   | 3727         | 77.6   | -0.160  | 1339     | 84.0   | 772      | 85.2   | 413      | 92.0   |
| <i>Lethe baileyi</i>         | 15,225       | 79.0   | -0.023  | 11,208   | 3735         | 77.4   | -0.155  | 1345     | 83.4   | 769      | 85.0   | 410      | 91.9   |
| <i>Lethe baucis</i>          | 15,251       | 78.7   | -0.031  | 11,209   | 3735         | 76.7   | -0.155  | 1343     | 84.2   | 773      | 85.5   | 410      | 92.9   |
| <i>Lethe confusa</i> *       | 14,945       | 80.4   | -0.055  | 11,200   | 3732         | 79.2   | -0.169  | 1361     | 84.7   | 772      | 85.3   |          |        |
| <i>Lethe dura</i>            | 15,259       | 79.2   | -0.035  | 11,233   | 3743         | 77.5   | -0.169  | 1341     | 83.8   | 752      | 85.3   | 432      | 92.3   |
| <i>Lethe hayashii</i>        | 15,246       | 79.0   | -0.036  | 11,206   | 3734         | 77.4   | -0.160  | 1337     | 85.0   | 763      | 85.2   | 416      | 93.3   |
| <i>Lethe helle</i>           | 15,253       | 78.6   | -0.019  | 11,205   | 3734         | 76.8   | -0.159  | 1340     | 84.2   | 769      | 85.1   | 411      | 91     |
| <i>Lethe marginalis</i>      | 15,229       | 80.2   | -0.042  | 11,209   | 3735         | 78.6   | -0.171  | 1320     | 84.5   | 771      | 85.9   | 409      | 94.4   |
| <i>Lethe nigrifascia</i>     | 15,239       | 79.4   | -0.023  | 11,208   | 3735         | 77.6   | -0.157  | 1355     | 83.3   | 769      | 85.1   | 413      | 92.5   |
| <i>Lethe oculatissima</i>    | 15,243       | 79.3   | -0.037  | 11,206   | 3734         | 77.4   | -0.163  | 1338     | 84.6   | 770      | 85.1   | 415      | 93     |
| <i>Lethe satyrina</i>        | 15,271       | 78.8   | -0.041  | 11,209   | 3735         | 76.8   | -0.165  | 1338     | 83.8   | 769      | 85     | 416      | 93.5   |
| <i>Lethe syrcis</i>          | 15,252       | 79.2   | -0.038  | 11,212   | 3736         | 77.4   | -0.166  | 1356     | 84.4   | 754      | 84.4   | 431      | 93.9   |
| <i>Lethe titania</i>         | 15,257       | 78.4   | -0.028  | 11,206   | 3734         | 76.7   | -0.163  | 1341     | 83.0   | 774      | 85.0   | 408      | 93.1   |
| <i>Lethe uemurai</i>         | 15,272       | 78.5   | -0.022  | 11,205   | 3734         | 76.6   | -0.162  | 1348     | 83.6   | 769      | 84.9   | 411      | 91     |
| <i>Lethe verma</i>           | 15,239       | 79.3   | -0.042  | 11,212   | 3736         | 77.6   | -0.163  | 1338     | 83.7   | 770      | 86.0   | 412      | 93.6   |
| <i>Maniola bathseba</i>      | 14,675       | 78.7   | -0.020  | 10,867   | 3621         | 76.4   | -0.154  | 1110     | 80.6   | 701      | 84.9   | 595      | 89.3   |
| <i>Maniola cecilia</i>       | 15,555       | 78.6   | -0.028  | 11,200   | 3733         | 76.2   | -0.166  | 1360     | 83.5   | 770      | 85.4   | 795      | 91.2   |
| <i>Maniola hyperantus</i> *  | 15,240       | 80.0   | -0.030  | 11,216   | 3737         | 78.5   | -0.157  | 1357     | 84.1   | 777      | 85.4   |          |        |
| <i>Maniola jurtina</i>       | 15,258       | 79.7   | -0.038  | 11,185   | 3727         | 78.2   | -0.165  | 1377     | 82.8   | 766      | 85.4   | 404      | 93.8   |
| <i>Melanargia asiatica</i>   | 15,142       | 79.0   | -0.036  | 11,190   | 3728         | 77.5   | -0.169  | 1336     | 84.4   | 775      | 85.6   | 319      | 81.9   |
| <i>Melanargia cao</i>        | 15,469       | 79.8   | -0.028  | 11,191   | 3729         | 77.6   | -0.167  | 1360     | 84.1   | 774      | 86.0   | 644      | 94.8   |
| <i>Melanargia galathea</i>   | 15,047       | 79.2   | -0.049  | 11,074   | 3690         | 78.6   | -0.173  | 1365     | 85.3   | 784      | 83.1   | 343      | 97.3   |
| <i>Melanargia ines</i>       | 15,032       | 80.8   | -0.054  | 11,189   | 3729         | 79.2   | -0.169  | 1358     | 85.1   | 735      | 87.1   | 344      | 91.6   |
| <i>Melanitis leda</i>        | 15,122       | 89.5   | -0.037  | 11,194   | 3730         | 78.4   | -0.166  | 1332     | 84.0   | 774      | 85.0   | 314      | 89.5   |
| <i>Melanitis phedima</i>     | 15,142       | 89.7   | -0.037  | 11,179   | 3725         | 78.4   | -0.166  | 1329     | 84.0   | 780      | 85.1   | 183      | 89.7   |
| <i>Minois dryas</i>          | 15,194       | 80.2   | -0.028  | 11,200   | 3732         | 78.7   | -0.161  | 1332     | 84.5   | 773      | 85.7   | 381      | 94.0   |
| <i>Mycalesis francisca</i>   | 15,279       | 79.9   | -0.037  | 11,203   | 3733         | 78.1   | -0.160  | 1341     | 84.9   | 775      | 86.2   | 410      | 92.7   |

|                              |        |      |        |        |      |      |        |      |      |     |      |      |      |
|------------------------------|--------|------|--------|--------|------|------|--------|------|------|-----|------|------|------|
| <i>Mycalesis intermedia</i>  | 15,386 | 80.8 | -0.029 | 11,077 | 3691 | 79.0 | -0.163 | 1352 | 85.7 | 770 | 85.5 | 512  | 93.3 |
| <i>Mycalesis mineus</i> *    | 15,267 | 80.8 | -0.030 | 11,140 | 3712 | 79.2 | -0.163 | 1080 | 84.2 | 770 | 85.1 |      |      |
| <i>Neope muirheadii</i>      | 15,217 | 80.0 | -0.055 | 11,206 | 3734 | 78.5 | -0.157 | 1333 | 83.9 | 772 | 85.9 | 413  | 93.0 |
| <i>Neope pulaha</i>          | 15,209 | 79.1 | -0.039 | 11,194 | 3730 | 77.5 | -0.161 | 1329 | 83.9 | 781 | 85.6 | 127  | 89.2 |
| <i>Ninguta schrenckii</i>    | 15,261 | 80.2 | -0.053 | 11,185 | 3726 | 78.6 | -0.165 | 1342 | 84.8 | 772 | 84.6 | 403  | 92.2 |
| <i>Oeneis buddha</i>         | 15,259 | 79.6 | -0.029 | 11,205 | 3734 | 78.1 | -0.157 | 1362 | 83.6 | 768 | 84.6 | 452  | 91.4 |
| <i>Oeneis urda</i>           | 15,248 | 80.0 | -0.022 | 11,179 | 3724 | 78.3 | -0.159 | 1346 | 84.6 | 774 | 85.3 | 415  | 94.0 |
| <i>Pararge aegeria</i>       | 15,239 | 80.5 | -0.034 | 11,185 | 3727 | 78.9 | -0.160 | 1340 | 84.8 | 772 | 85.7 | 420  | 94.3 |
| <i>Paroeneis palaeartica</i> | 15,942 | 78.2 | -0.022 | 11,212 | 3736 | 78.8 | -0.157 | 1362 | 83.1 | 852 | 78.5 | 1039 | 61.8 |
| <i>Triphysa phryne</i>       | 15,143 | 80.0 | -0.036 | 11,185 | 3727 | 77.3 | -0.171 | 1343 | 84.3 | 775 | 84.9 | 316  | 83.5 |
| <i>Ypthima akragas</i> *     | 15,227 | 81.9 | -0.054 | 11,206 | 3734 | 78.9 | -0.160 | 1326 | 85.7 | 546 | 84.8 |      |      |
| <i>Ypthima motschulskyi</i>  | 15,232 | 81.8 | -0.051 | 11,169 | 3722 | 80.5 | -0.152 | 1274 | 85.2 | 813 | 86.8 | 360  | 93.9 |
| <i>Ypthima baldus</i>        | 15,304 | 80.8 | -0.045 | 11,181 | 3726 | 80.5 | -0.151 | 1384 | 84.6 | 779 | 85.9 | 369  | 91.6 |

Note: \* the mitochondrial genome of the indicated species is incomplete.

**Table S3.** List of taxon used for the phylogenetic analyses in this study.

| <b>Taxon</b>                 | <b>Mitogenome size(bp)</b> | <b>GenBank accession no.</b> | <b>Reference</b> |
|------------------------------|----------------------------|------------------------------|------------------|
| Satyrinae                    |                            |                              |                  |
| Elymniini                    |                            |                              |                  |
| <i>Elymnias hypermnestra</i> | 15,167                     | KF906484                     | Shi et al.[31]   |
| Melanitini                   |                            |                              |                  |
| <i>Melanitis phedima</i>     | 15,142                     | KF590538                     | Wu et al.[33]    |
| <i>Melanitis leda</i>        | 15,122                     | JF905446                     | Shi et al [34]   |
| Satyrini                     |                            |                              |                  |
| <i>Callerebia suroia</i>     | 15,208                     | NC026060                     | Unpublished      |
| <i>Coenonympha amaryllis</i> | 15,125                     | NC046491                     | Zhou et al.[32]  |
| <i>Coenonympha arcania</i>   | 15,189                     | ERR3169554                   |                  |
| <i>Coenonympha tullia</i>    | 15,316                     | KM592972                     | Unpublished      |
| <i>Davidina armandi</i>      | 15,214                     | KF881046                     | Unpublished      |
| <i>Hipparchia autonoe</i>    | 15,489                     | OK094488                     | This study       |
| <i>Lasiommata deidamia</i>   | 15,244                     | MG880214                     | Unpublished      |
| <i>Lasiommata maera</i>      | 15,192                     | ERR3169666                   |                  |
| <i>Lasiommata majuscula</i>  | 15,263                     | MN012997                     | Unpublished      |
| <i>Lasiommata megera</i>     | 15,328                     | ERR3169678                   |                  |
| <i>Lethe albolineata</i>     | 15,248                     | NC028507                     | Li et al.[35]    |
| <i>Lethe baileyi</i>         | 15,225                     | NC050905                     | Lu et al.[29]    |
| <i>Lethe baucis</i>          | 15,251                     | NC050906                     | Lu et al.[29]    |
| <i>Lethe confusa</i>         | 14,945                     | MT654529                     | Unpublished      |
| <i>Lethe dura</i>            | 15,259                     | KF906485                     | Shi et al.[31]   |
| <i>Lethe hayashii</i>        | 15,246                     | NC050907                     | Lu et al.[29]    |
| <i>Lethe helle</i>           | 15,253                     | NC050908                     | Lu et al.[29]    |
| <i>Lethe marginalis</i>      | 15,229                     | NC050909                     | Lu et al.[29]    |
| <i>Lethe nigrifascia</i>     | 15,239                     | NC050910                     | Lu et al.[29]    |

|                              |        |            |                  |
|------------------------------|--------|------------|------------------|
| <i>Lethe oculatissima</i>    | 15,243 | NC050911   | Lu et al.[29]    |
| <i>Lethe satyrina</i>        | 15,271 | NC050912   | Lu et al.[29]    |
| <i>Lethe syrcis</i>          | 15,252 | NC050913   | Lu et al.[29]    |
| <i>Lethe titania</i>         | 15,257 | NC050914   | Lu et al.[29]    |
| <i>Lethe uemurai</i>         | 15,272 | NC050915   | Lu et al.[29]    |
| <i>Lethe verma</i>           | 15,239 | NC050916   | Lu et al.[29]    |
| <i>Maniola bathseba</i>      | 14,675 | SRR8850746 |                  |
| <i>Maniola cecilia</i>       | 15,555 | ERR3169794 |                  |
| <i>Maniola hyperantus</i>    | 15,240 | KM592969   | Unpublished      |
| <i>Maniola jurtina</i>       | 15,258 | HG995237   | Unpublished      |
| <i>Melanargia asiatica</i>   | 15,142 | NC024550   | Huang et al.[36] |
| <i>Melanargia cao</i>        | 15,469 | MN012999   | Unpublished      |
| <i>Melanargia galathea</i>   | 15,047 | SRR885066  |                  |
| <i>Melanargia ines</i>       | 15,032 | ERR3169723 |                  |
| <i>Minois dryas</i>          | 15,194 | NC046591   | Yang et al.[37]  |
| <i>Mycalesis francisca</i>   | 15,279 | MN242790   | Yang et al.[37]  |
| <i>Mycalesis intermedia</i>  | 15,386 | MN610565   | Wu et al.[38]    |
| <i>Mycalesis mineus</i>      | 15,267 | KM244676   | Tang et al.[39]  |
| <i>Neope muirheadii</i>      | 15,217 | MN242789   | Yang et al.[37]  |
| <i>Neope pulaha</i>          | 15,209 | KF590543   | Wu et al.[33]    |
| <i>Ninguta schrenckii</i>    | 15,261 | KF881052   | Fan et al.[40]   |
| <i>Oeneis buddha</i>         | 15,259 | OK094489   | This study       |
| <i>Oeneis urda</i>           | 15,248 | NC046889   | Zhou et al.[41]  |
| <i>Pararge aegeria</i>       | 15,239 | KJ547676   | da Costa. [42]   |
| <i>Paroeneis palaeartica</i> | 15,942 | OK094490   | This study       |
| <i>Triphysa phryne</i>       | 15,143 | KF906487   | Zhang et al.[43] |
| <i>Ypthima akragas*</i>      | 15,227 | KF590553   | Wu et al.[33]    |
| <i>Ypthima motschulskyi</i>  | 15,232 | MN242788   | Yang et al.[37]  |
| <i>Ypthima baldus</i>        | 15,304 | MN708051   | Li et al.[44]    |
